# Supplementary material for: Gas Phase Hydrogenation of Furaldehydes via Coupling with Alcohol Dehydrogenation over Ceria Supported Au-Cu
Source: MDPI journal article supplement (doi:10.3390/molecules23112905), 2018-11-07
Supplement: s1 [file s1]

# Supplementary Material

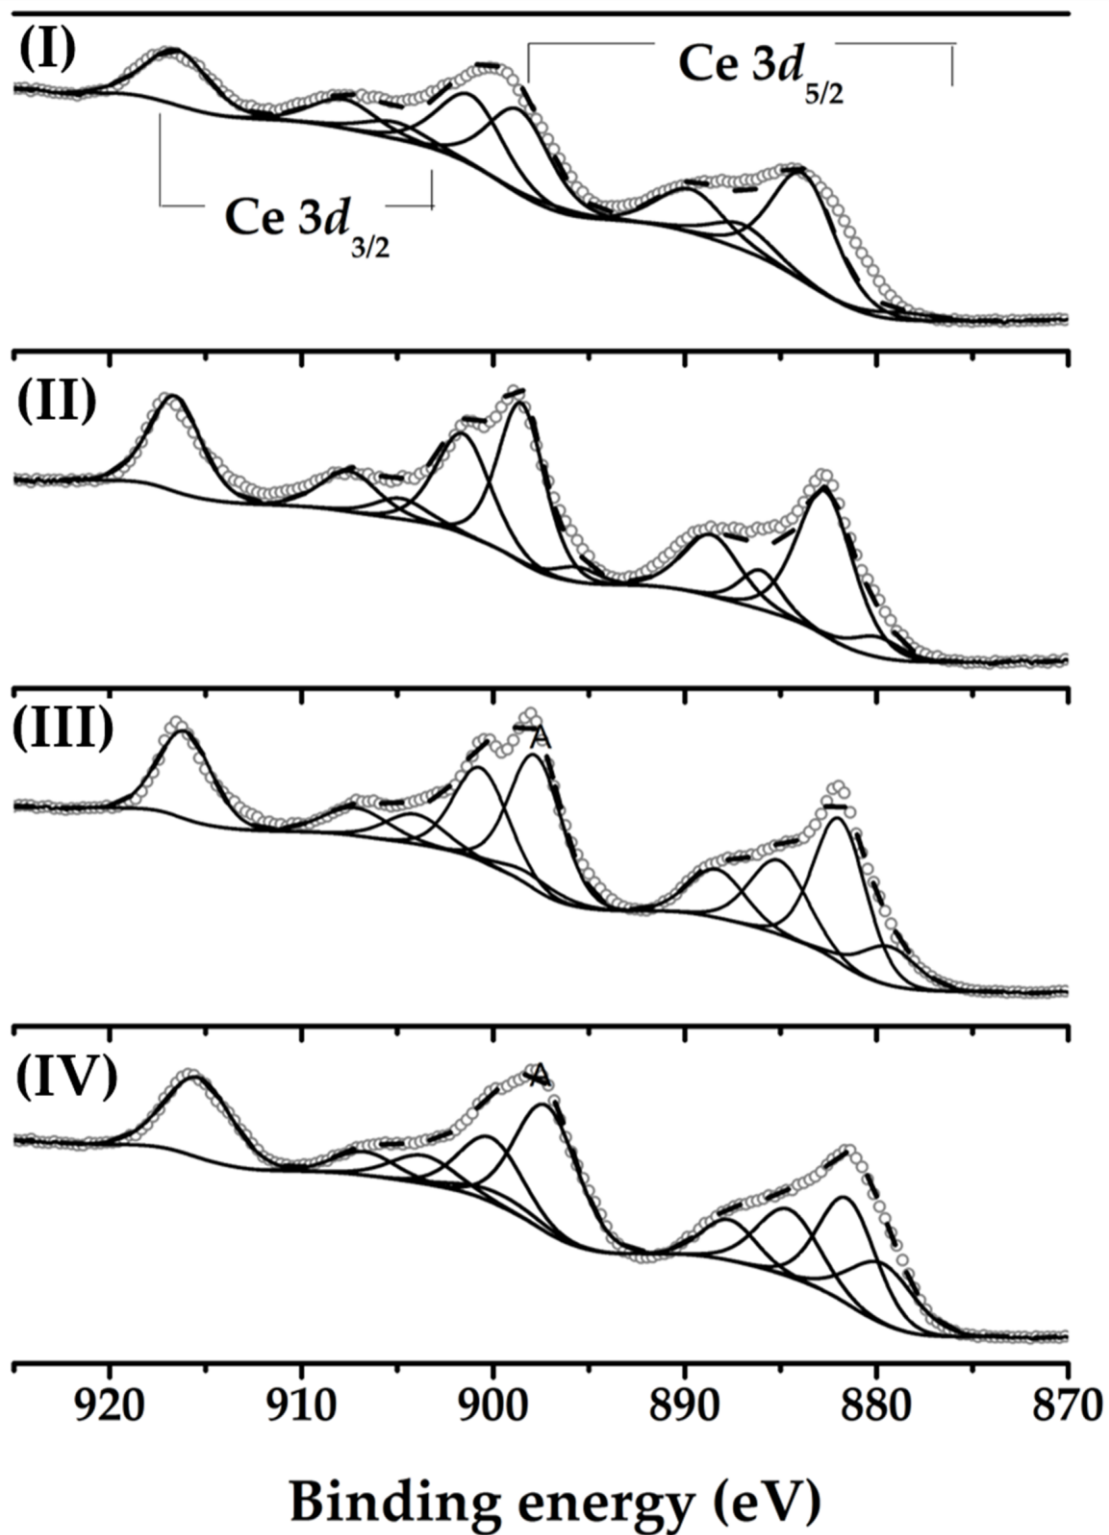

**Figure S1:** XPS spectra over the Ce 3d region for (I) fresh CeO<sub>2</sub>, (II) CeO<sub>2</sub> thermally treated in H<sub>2</sub> to 573 K, (III) Au-Cu/CeO<sub>2</sub> and (IV) Au/CeO<sub>2</sub>. *Note:* Raw data are shown as open symbols (O) while curve fitted and envelope is represented by solid and dashed lines.
